# Supplementary material
Source: PubMed Central journal article supplement (PMC2857698)
Supplement: NIHMS192239-supplement-1_si_001.pdf [file NIHMS192239-supplement-1_si_001.pdf]

## Supplementary Material

### Charge Effects in the Selection of NPF Motifs by the EH Domain of EHD1

Gillian D. Henry, Daniel J. Corrigan, Joseph V. Dineen and James D. Baleja

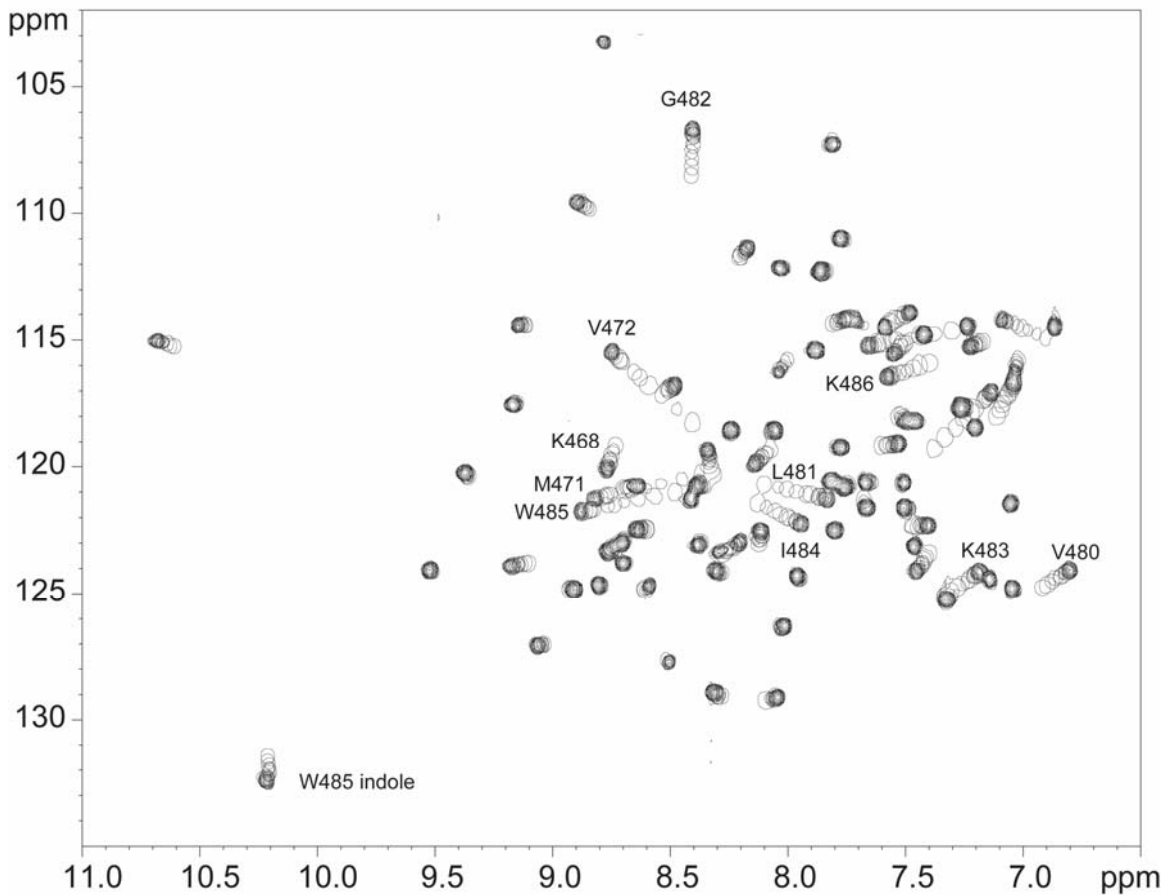

**Figure S1.** Overlaid  $^1\text{H}/^{15}\text{N}$  HSQC spectra recorded at 500MHz ( $^1\text{H}$ ) and 25°C showing the titration of EHD1 EH with Rsn5-NPF1. Protein was 250  $\mu\text{M}$  in 10 mM imidazole- $d_4$  pH 6.8, 10 mM NaCl, 1 mM  $\text{CaCl}_2$ , 0.02%  $\text{NaN}_3$  and 10%  $\text{D}_2\text{O}$ . The final peptide concentration was 1.7mM. A single contour level is shown for each datapoint except the last. Selected residues that move substantially during the titration are labeled.

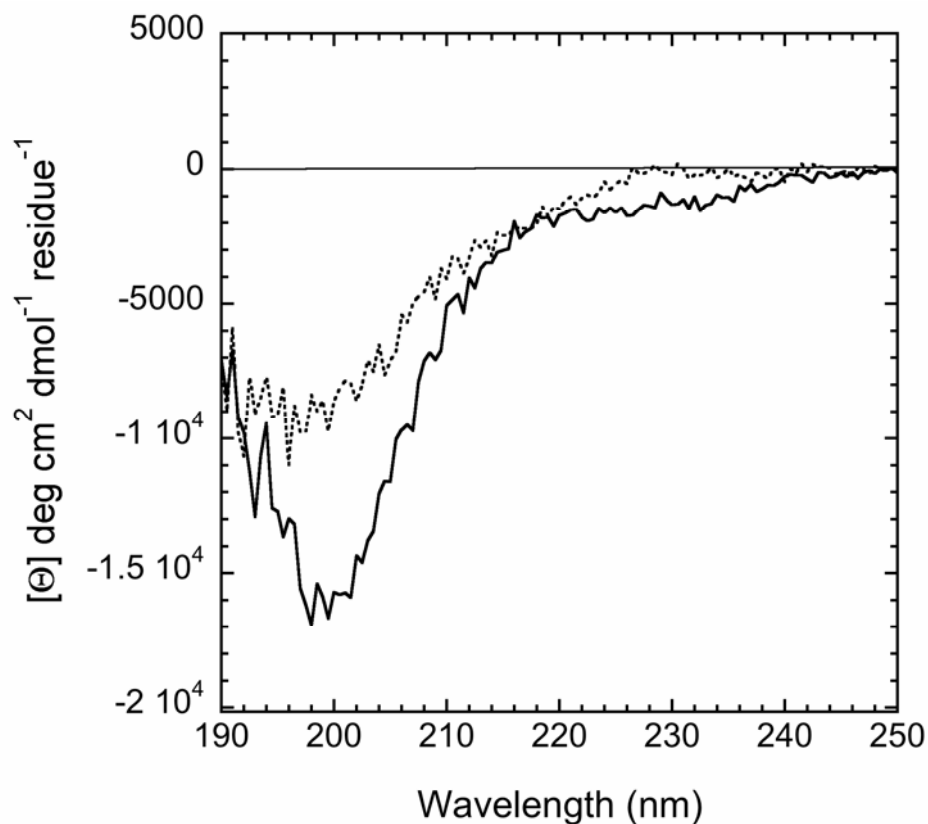

**Figure S2.** Far UV circular dichroism spectra of Rsn5-NPF1 (solid line) and Rfp-NPF2 (dotted line). Peptides were  $0.1 \text{ mg mL}^{-1}$  in 5 mM TrisHCl pH 7.5 and spectra were collected using a 1 mm pathlength cell at  $5^\circ\text{C}$ . Neither peptide shows any evidence of  $\beta$ -turn formation and the spectra are consistent with random coil. The smaller absorption band at 200 nm for Rfp-NPF2 is expected due to positive contributions from the tyrosine sidechain at this wavelength (Brahms, S. and Brahms, J. 1980. *J. Mol. Biol.* **138** 149-178).

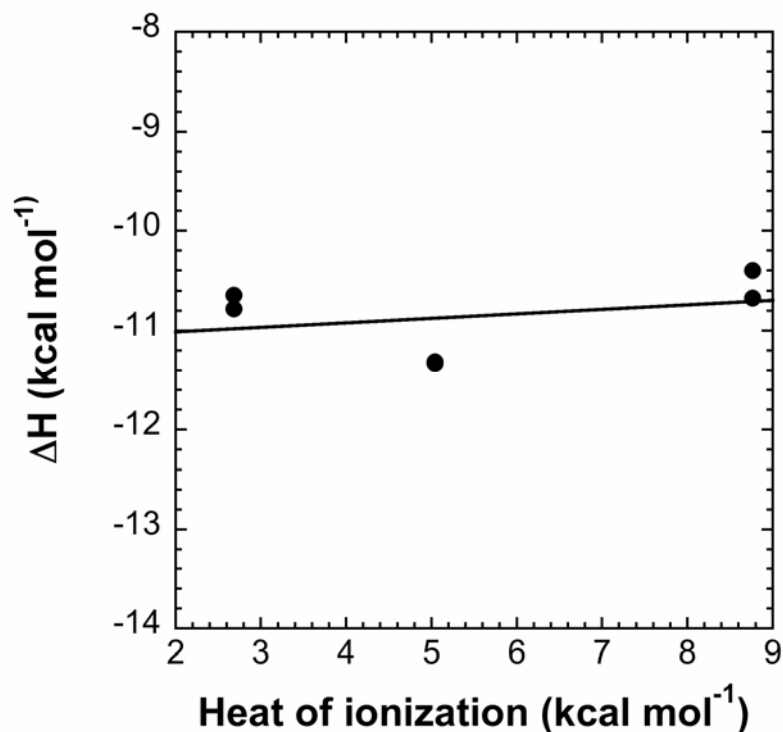

**Figure S3.** The apparent enthalpy of binding,  $\Delta H_{\text{apparent}}$  is given by  $\Delta H_{\text{apparent}} = \Delta H_{\text{true}} + n \Delta H_{\text{ion}}$ , where  $\Delta H_{\text{true}}$  is the true enthalpy of binding and  $n$  is the number of protons transferred to the buffer during the binding reaction. The plot shows the apparent enthalpy of binding of Rsn5-NPF1 to EHD1 EH as a function of buffer ionization enthalpy ( $\Delta H_{\text{ion}}$ ). The points represent titrations in 20mM PIPES ( $\Delta H_{\text{ion}} = 2.68 \text{ kcal mol}^{-1}$ ), 20mM MOPS ( $\Delta H_{\text{ion}} = 5.04 \text{ kcal mol}^{-1}$ ) and 20mM imidazole ( $\Delta H_{\text{ion}} = 8.76 \text{ kcal mol}^{-1}$ ). All solutions contained 1mM  $\text{CaCl}_2$ . The slope,  $n$ , is 0.04, showing that proton transfer during the binding reaction is negligible.

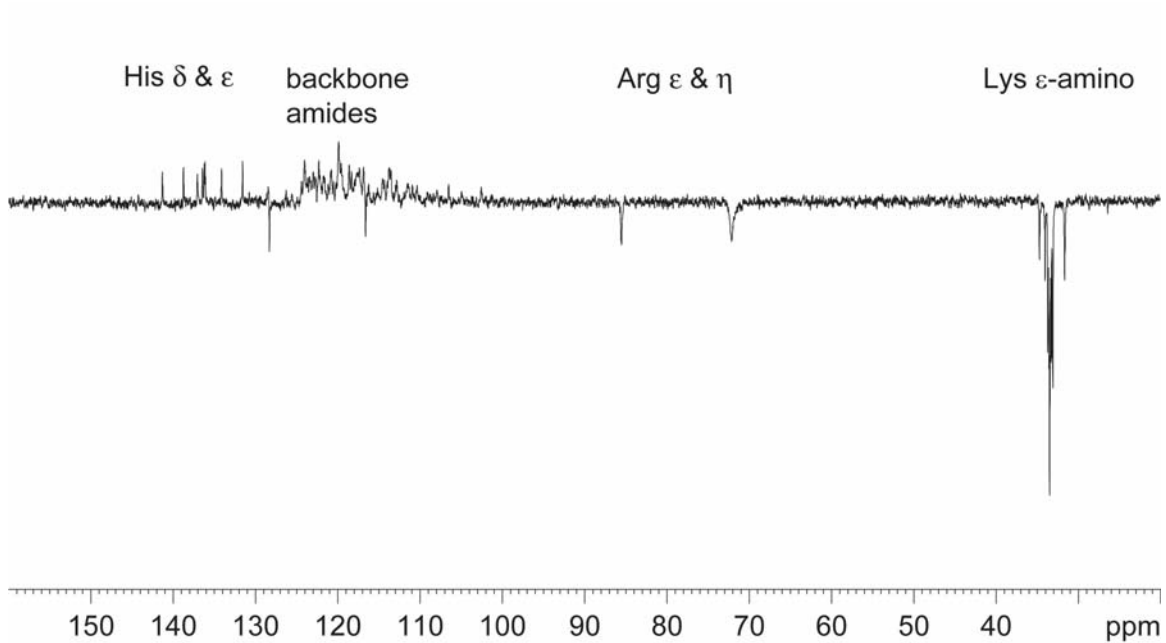

**Figure S4.** 30MHz proton-decoupled direct-observe  $^{15}\text{N}$  spectrum of 2.5mM EHD1 EH without peptide at 25°C. 20,000 scans were collected with a 2.7s acquisition time and 0.1s recycle delay with WALTZ decoupling of the protons applied continuously. The spectral width was 200 ppm. Line broadening is 1Hz.  $^{15}\text{N}$  chemical shifts are reported with respect to liquid ammonia at 0 ppm. The large negative  $^{15}\text{N}$  NOE results in negative peaks for the more mobile nitrogen atoms.

Table S1. Association constants for other NPF peptide-EH protein interactions.

| Peptide                                    |           | Protein               | $K_a$ ( $M^{-1}$ )    |
|--------------------------------------------|-----------|-----------------------|-----------------------|
| Ac-LKEYNPFEEED-NH <sub>2</sub>             | Rsn5-NPF2 | EHD1 EH               | 9.78e+5               |
| Ac-AVAGNPFIQPD-NH <sub>2</sub>             | Rsn5-NPF3 | EHD1 EH               | 1.40e+4               |
| Ac-SPAPNPFSEED-NH <sub>2</sub>             | Rsn5-NPF4 | EHD1 EH               | 1.11e+5               |
| Ac-AVAGNPFIQED-NH <sub>2</sub>             |           | EHD1 EH               | 6.39e+4               |
| Ac-AVAGNPFIEED-NH <sub>2</sub>             |           | EHD1 EH               | 2.14e+5               |
| Ac-AVAGNPFDEED-NH <sub>2</sub>             |           | EHD1 EH               | 6.65e+5               |
| Ac-GPSLNPFDEED-NH <sub>2</sub>             | Rsn5-NPF1 | Reps1 EH              | 2e+3                  |
| Ac-GPSLNPFDEED-NH <sub>2</sub>             | Rsn5-NPF1 | Eps15 EH <sub>2</sub> | no measurable binding |
| Ac-YESTNPF <sup>TAK</sup> -NH <sub>2</sub> | Rfp2-NPF2 | Reps1 EH              | 2e+3                  |
